# Supplementary material for: A genomic island present along the bacterial chromosome of the Parachlamydiaceae UWE25, an obligate amoebal endosymbiont, encodes a potentially functional F-like conjugative DNA transfer system
Source: PubMed Central journal article supplement (PMC548262; doi:10.1186/1471-2180-4-48), 2004-12-22

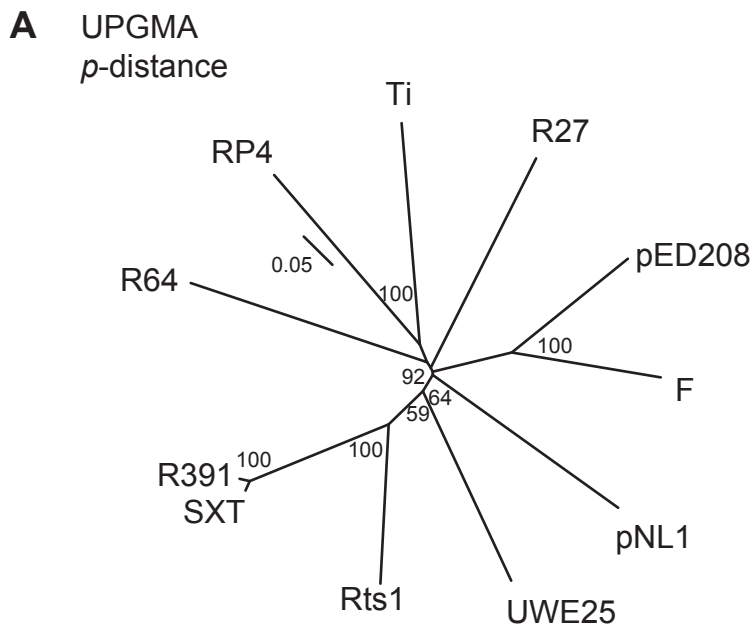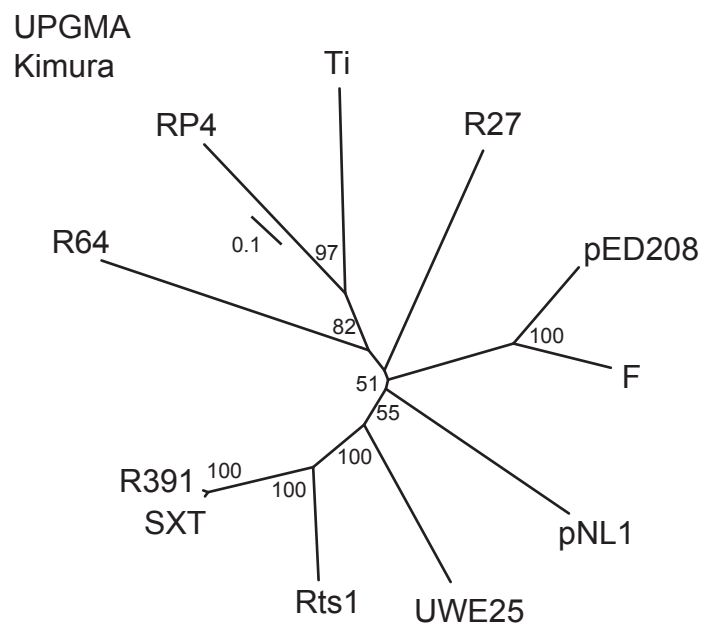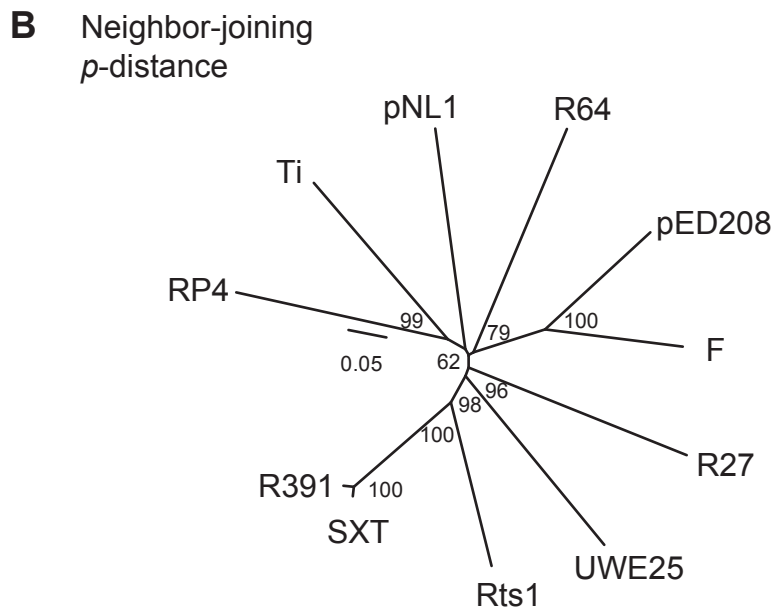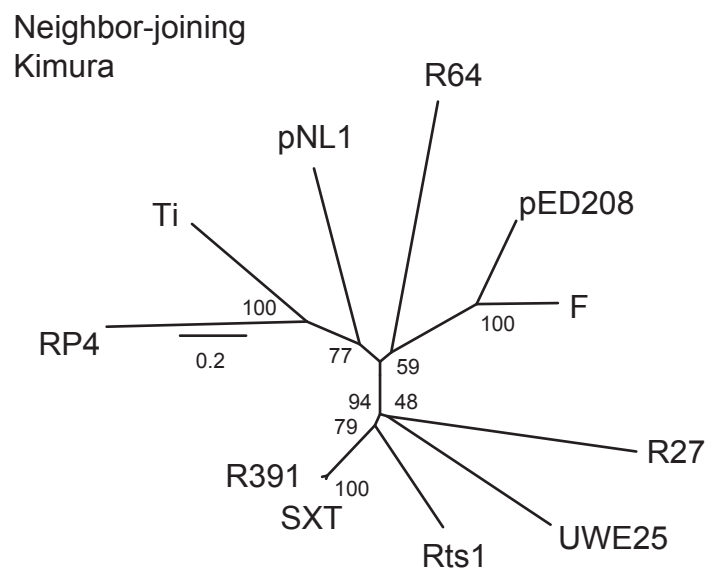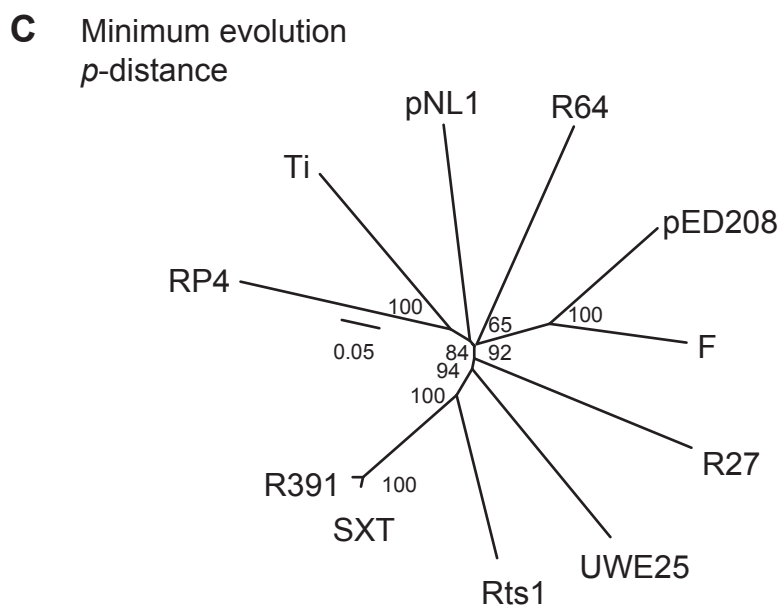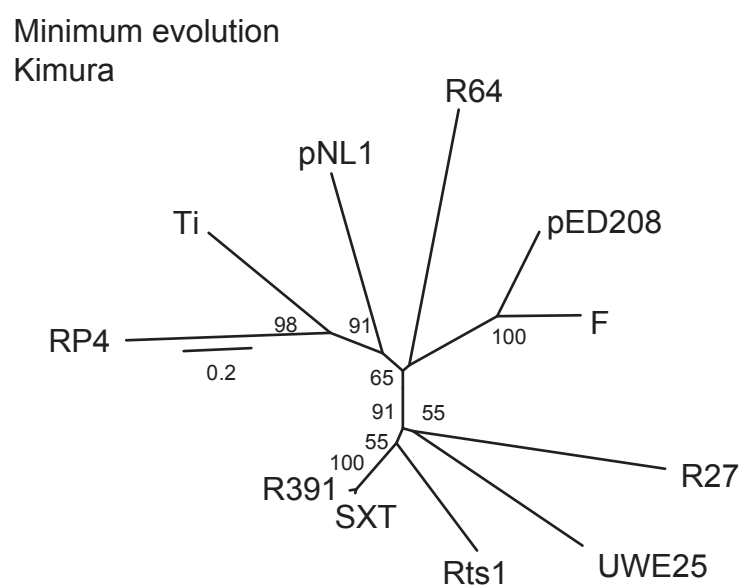

Supplement: 1471-2180-4-48-S2.pdf [file 1471-2180-4-48-S2.pdf]
